# Supplementary material
Source: Springer Nature journal article supplement (https://www.springermedizin.de/resource/supplementary/12995_2007_55_MOESM1_ESM.pdf/9622648)
Supplement: MOESM1 [file 9622648]

**Factorial structure**

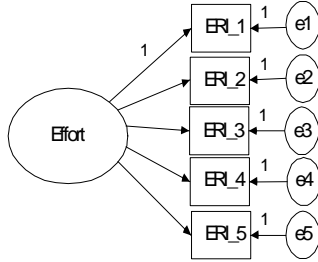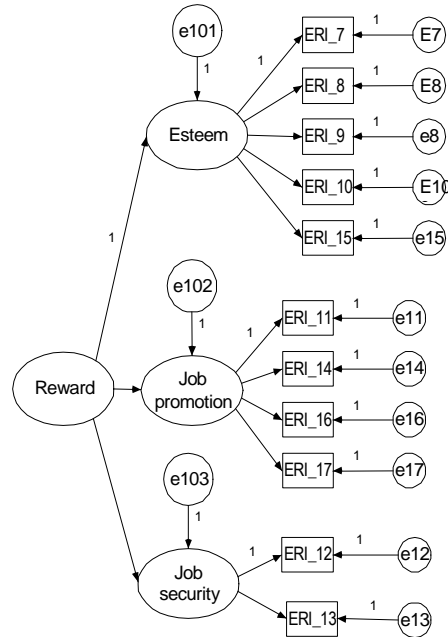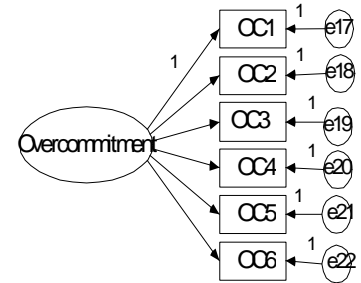

1st order CFA

2nd order CFA

1st order CFA

Cronbach's  $\alpha$   
AGFI  
Standardized RMR  
Loading ( $\lambda$ )<sup>a</sup>

0.72  
0.99  
0.04  
0.72; 0.60; 0.46; 0.47; 0.65

0.99  
0.03  
Esteem: 0.69; 0.47; 0.62; 0.56; 0.83  
Job promotion: 0.66; 0.53; 0.75; 0.41  
Job insecurity: 0.53; 0.39  
Reward: 0.79; 0.85; 0.82

0.79  
0.99  
0.03  
0.48; 0.69; 0.60; 0.53; 0.83; 0.63
